# Supplementary material
Source: PubMed Central journal article supplement (PMC9072929)
Supplement: mmc1.pdf [file mmc1.pdf]

# THE LANCET

## Child & Adolescent Health

### Supplementary appendix

This appendix formed part of the original submission and has been peer reviewed. We post it as supplied by the authors.

Supplement to: Nygaard U, Holm M, Hartling UB, et al. Incidence and clinical phenotype of multisystem inflammatory syndrome in children after infection with the SARS-CoV-2 delta variant by vaccination status: a Danish nationwide prospective cohort study. *Lancet Child Adolesc Health* 2022; published online May 5. [https://doi.org/10.1016/S2352-4642\(22\)00100-6](https://doi.org/10.1016/S2352-4642(22)00100-6).

## **APPENDIX**

# **Incidence and clinical phenotype of multisystem inflammatory syndrome in children after infection with the SARS-CoV-2 delta variant by vaccination status: a Danish nationwide prospective cohort study**

*Ulrikka Nygaard, Mette Holm, Ulla Birgitte Hartling, Jonathan Glenthøj, Lisbeth Samsø Schmidt, Sannie Brit Nordly, Astrid Thaarup Matthesen, Marie-Louise von Linstow, Laura Espenhain*

Page 1

### **Supplementary Table**

Number of MIS-C cases, SARS-CoV-2 infections, and incidence of MIS-C in children and adolescents based on laboratory proven SARS-CoV-2 infections by age group, vaccination status and SARS-CoV-2 variant

Supplementary Table

Number of MIS-C cases, SARS-CoV-2 infections, and incidence of MIS-C in children and adolescents based on laboratory proven SARS-CoV-2 infections by age group, vaccination status and SARS-CoV-2 variant

|                               | <b>MIS-C FOLLOWING THE DELTA VARIANT</b><br>August 2021 to February 2022 |                                           |                                        |                         | <b>MIS-C FOLLOWING THE WILD TYPE VARIANT</b><br>March 2020 to February 2021 |                                              |                                        |                       |
|-------------------------------|--------------------------------------------------------------------------|-------------------------------------------|----------------------------------------|-------------------------|-----------------------------------------------------------------------------|----------------------------------------------|----------------------------------------|-----------------------|
|                               | MIS-C                                                                    | Proven SARS-CoV-2 infections <sup>1</sup> | Incidence of MIS-C following infection |                         | MIS-C                                                                       | Estimated SARS-CoV-2 infections <sup>2</sup> | Incidence of MIS-C following infection |                       |
|                               | N                                                                        | N                                         | Per 1,000,000 (95% CI)                 | Incidence of MIS-C      | N                                                                           | N                                            | Per 1,000,000 (95% CI)                 | Incidence of MIS-C    |
| <b>Not vaccinated</b>         |                                                                          |                                           |                                        |                         |                                                                             |                                              |                                        |                       |
| Total (age 0-17)              | 51                                                                       | 85,947                                    | 593 (442-780)                          | 1:1,700 (1,300-2,300)   | 23                                                                          | 38,974                                       | 590 (374-885)                          | 1:1,700 (1,100-2,700) |
| 0-4                           | 3                                                                        | 10,024                                    | 299 (62-874)                           | 1:3,300 (1,100-16,100)  | 4                                                                           | 5,466                                        | 732 (199-1,873)                        | 1:1,400 (500-5,500)   |
| 5-11                          | 42                                                                       | 58,863                                    | 714 (514-964)                          | 1:1,400 (1,000-1,900)   | 10                                                                          | 14,029                                       | 713 (342-1,311)                        | 1:1,400 (700-2,900)   |
| 12-17                         | 6                                                                        | 17,060                                    | 352 (129-765)                          | 1:2,800 (1,300-7,800)   | 9                                                                           | 19,479                                       | 462 (211-877)                          | 1:2,200 (1,100-4,700) |
| <b>Vaccinated<sup>3</sup></b> |                                                                          |                                           |                                        |                         |                                                                             |                                              |                                        |                       |
| 12-17                         | 1                                                                        | 6,570                                     | 152 (4-848)                            | 1:6,600 (1,200-260,000) |                                                                             |                                              |                                        |                       |

<sup>1</sup>Laboratory confirmed cases of SARS-CoV-2 in the period July 15 to December 15, 2021

<sup>2</sup>Estimated by serology

<sup>3</sup>Defined as SARS-CoV-2 infection occurring at least 14 days after the second vaccine dose
